# Supplementary material for: Development of a Simple DNA Extraction Method and Candida Pan Loop-Mediated Isothermal Amplification Assay for Diagnosis of Candidemia
Source: MDPI journal article supplement (doi:10.3390/pathogens11020111), 2022-01-18
Supplement: s1 [file s1]

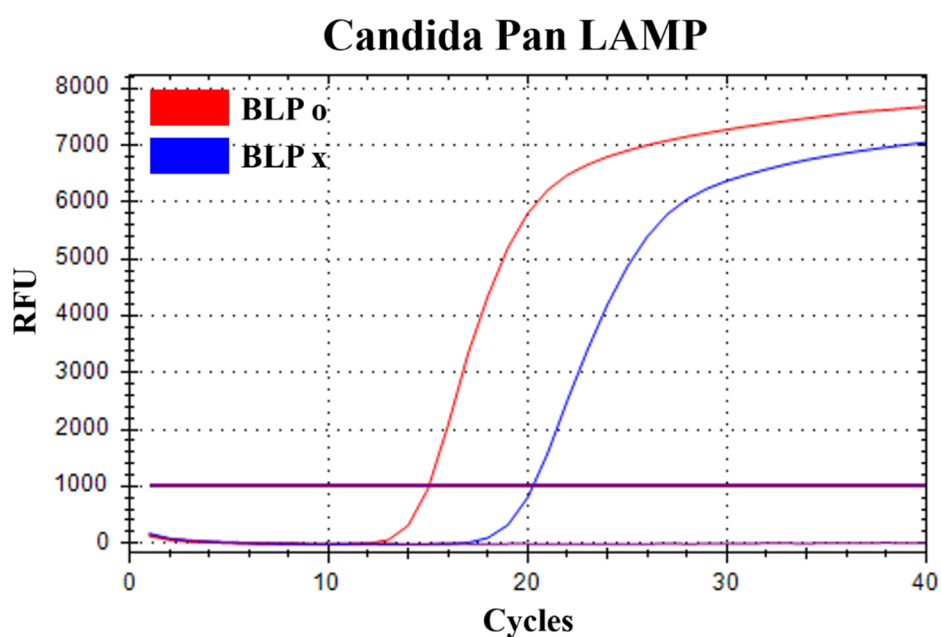

**Figure S1.** Comparison of ct values of Candida Pan LAMP assay with/without BLP.

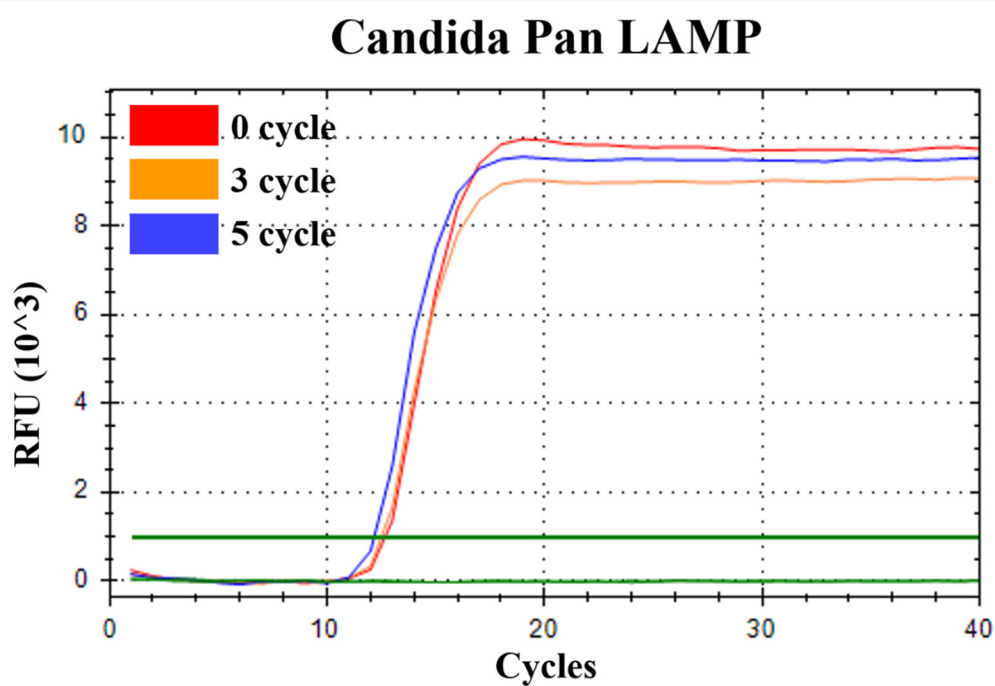

**Figure S2.** Comparison of ct values of lamp assay according to bead beat cycles (0, 5 and 10 cycles) in Chelex-100/boiling DNA extraction.
